# Supplementary material for: Discovery of an inhibitor of DNA-driven inflammation that preferentially targets the AIM2 inflammasome
Source: PubMed Central journal article supplement (PMC10193008; doi:10.1016/j.isci.2023.106758), 2023-04-27
Supplement: mmc1.pdf [file mmc1.pdf]

iScience, Volume 26

## **Supplemental information**

### **Discovery of an inhibitor of DNA-driven inflammation that preferentially targets the AIM2 inflammasome**

**Jack P. Green, Lina Y. El-Sharkawy, Stefan Roth, Jie Zhu, Jiayu Cao, Andrew G. Leach, Arthur Liesz, Sally Freeman, and David Brough**

## Supplementary Figure 1

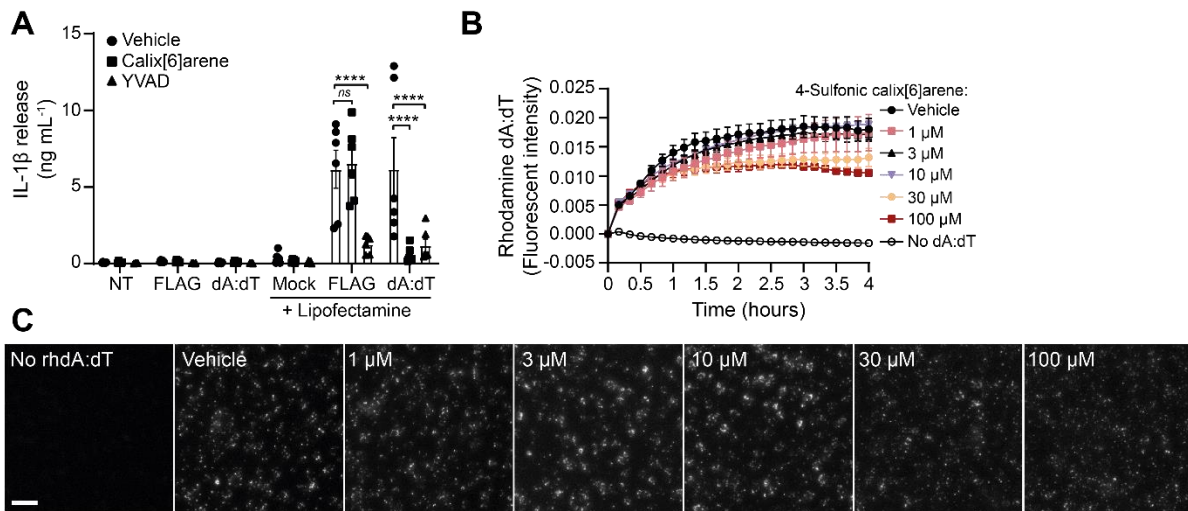

**Supplementary Figure 1 – 4-Sulfonic calix[6]arene does not impact transfection.** Related to Figure 1. **(A)** IL-1 $\beta$  release in the supernatants of LPS-primed (1  $\mu$ g mL<sup>-1</sup>, 4 h) BMDMs. BMDMs were pre-treated with 4-sulfonic calix[6]arene (30  $\mu$ M), the caspase-1 inhibitor Ac-YVAD-CMK (YVAD, 100  $\mu$ M) or vehicle control (DMSO) before stimulation with poly dA:dT (1  $\mu$ g mL<sup>-1</sup>) or flagellin (1  $\mu$ g mL<sup>-1</sup>) in the presence or absence of lipofectamine 3000 for 4 h (n=6). **(B)** Fluorescence intensity of rhodamine-tagged poly dA:dT (1  $\mu$ g mL<sup>-1</sup>) transfected into bone marrow-derived macrophages (BMDMs) in the presence of the indicated concentration of 4-sulfonic calix[6]arene (1-100  $\mu$ M) (n=3). **(C)** Representative images of BMDMs from the experiment in (A) (scale bar = 100  $\mu$ m). \*\*\*\*p>0.0001 determined by a two-way ANOVA with Dunnett's post hoc analysis vs vehicle control. Values shown are mean  $\pm$  the SEM.

## Supplementary Figure 2

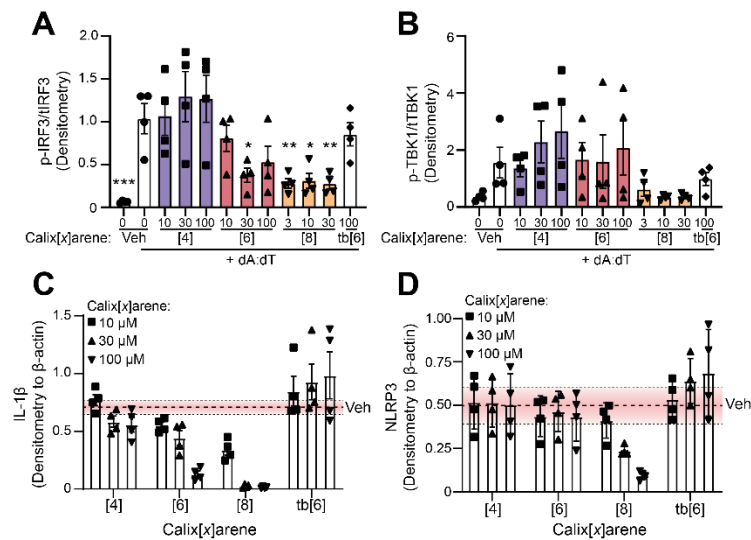

**Supplementary Figure 2 – Densitometry from Figure 3: Inhibition of dsDNA inflammatory signalling by 4-sulfonic calixarenes is readily reversible and is mediated by the exposed sulfonic acid groups.** Related to Figure 3. **(A)** The ratio of p-IRF3 (Ser396) to total IRF3 and **(B)** the ratio of p-TBK1 to total TBK1 determined by densitometry of experiments shown in Fig 3G (n=4). **(C)** Densitometry of IL-1 $\beta$  and **(D)** NLRP3 from experiments shown in Fig 3I (n=4). \*p<0.05, \*\*p<0.01, \*\*\*p>0.001 determined by a one-way ANOVA with Dunnett's post hoc analysis vs vehicle control. Values shown are mean  $\pm$  the SEM.

### Supplementary Figure 3

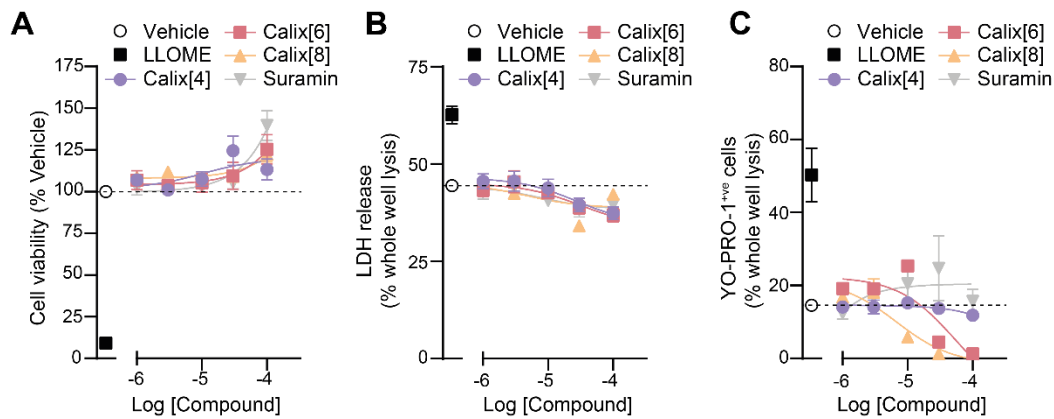

**Supplementary Figure 3 – 4-Sulfonic calixarenes and suramin are not cytotoxic in BMDMs.** Related to Figure 3. BMDMs were incubated for 24 h with the indicated concentration (1-100  $\mu$ M) of 4-sulfonic calix[4]arene (Calix[4]), 4-sulfonic calix[6]arene (Calix[6]), 4-sulfonic calix[8]arene (Calix[8]), suramin, or a vehicle control (DMSO (0.5% v/v)). LLOME (1 mM, 1 h) was used alongside as a positive control of cell death. **(A)** MTT assay (n=4). **(B)** LDH release from BMDMs into the supernatant (n=3). **(C)** YO-PRO-1<sup>+</sup>ve cells assessed by microscopy (n=3). Representative images can be found in Supplementary figure 4. Concentration-response curves were fitted using a three parameter logistical (3PL) model. Values shown are mean  $\pm$  the SEM.

Supplementary Figure 4

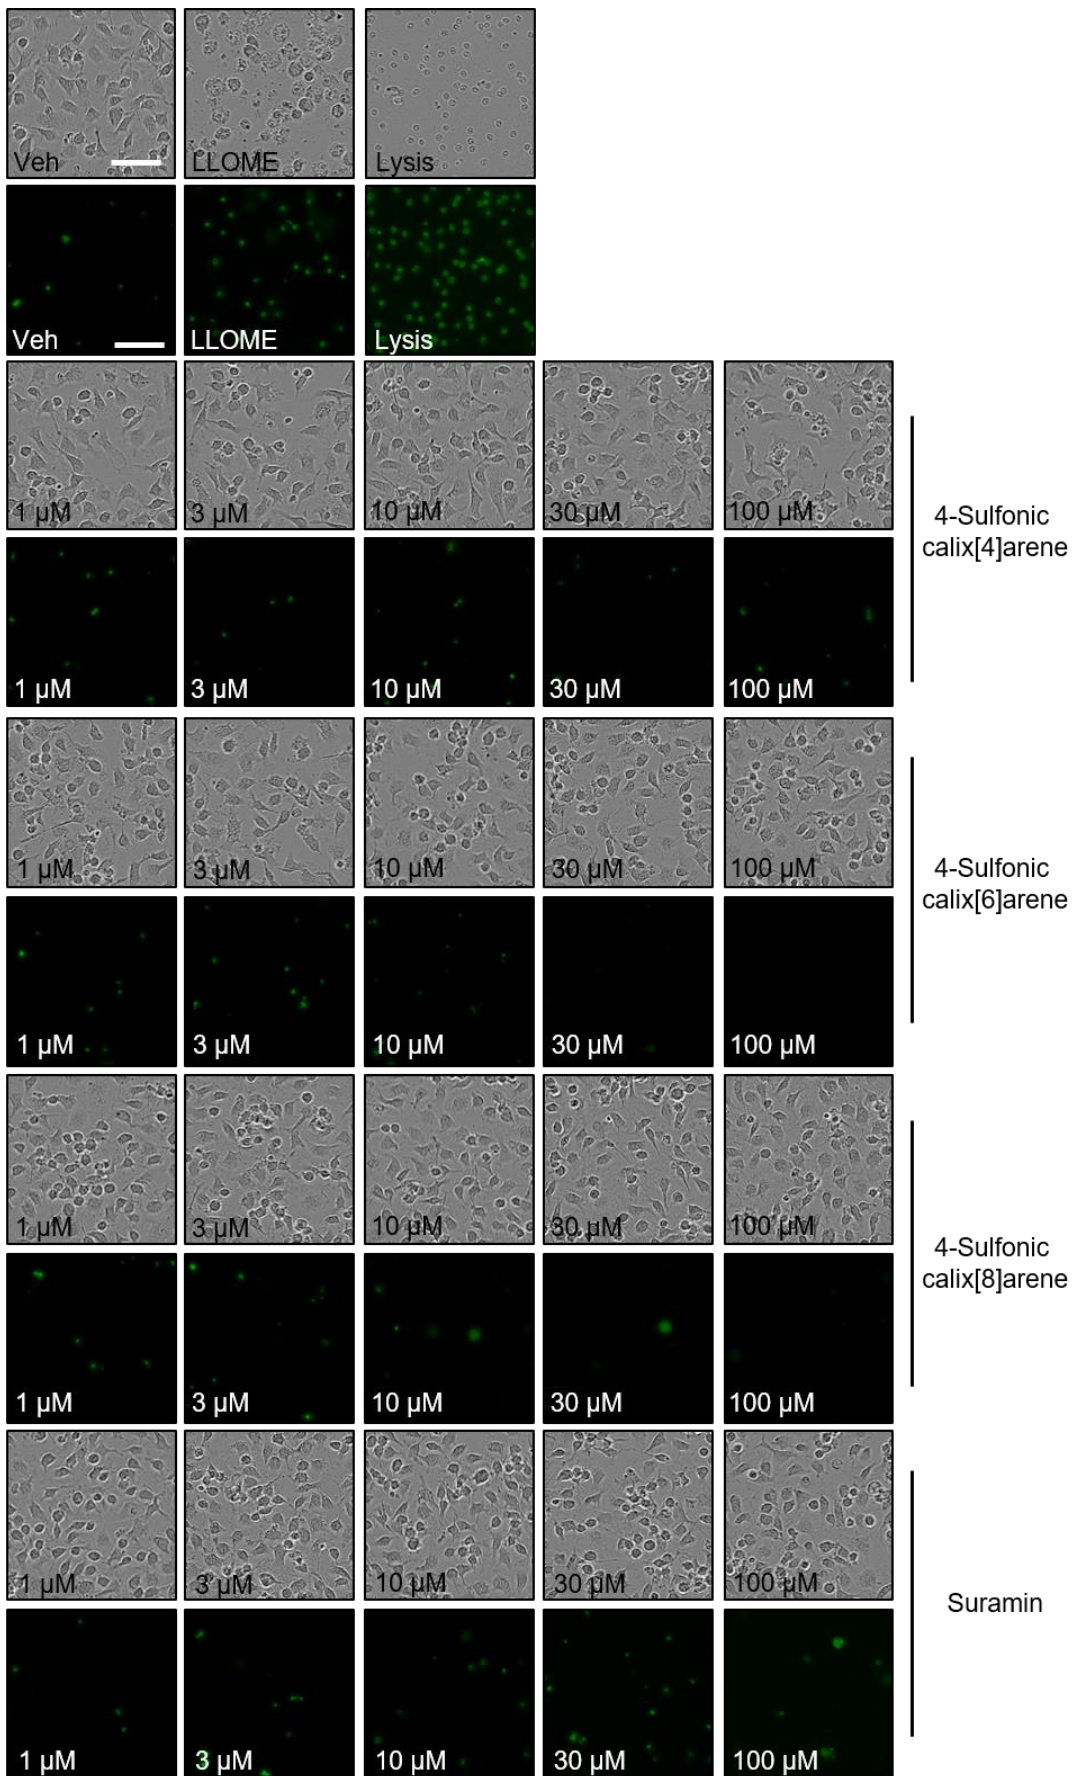

**Supplementary Figure 4 - 4-Sulfonic calixarenes and suramin are not cytotoxic in BMDMs.** Related to Figure 3. Representative phase contrast and YO-PRO-1 staining in BMDMs treated with the indicated concentration (1-100  $\mu$ M) 4-sulfonic calix[4]arene, 4-sulfonic calix[6]arene, 4-sulfonic calix[8]arene, suramin or a vehicle control (DMSO, 0.5% v/v) for 24 hr (n=3) (scale bar = 100  $\mu$ m). LLOME (1 mM, 1 h) and a full lysis (triton x100, 0.25% v/v) was used alongside as a positive control of cell death. Quantification of YO-PRO-1 fluorescence can be found in supplementary figure 3.

Supplementary Figure 5

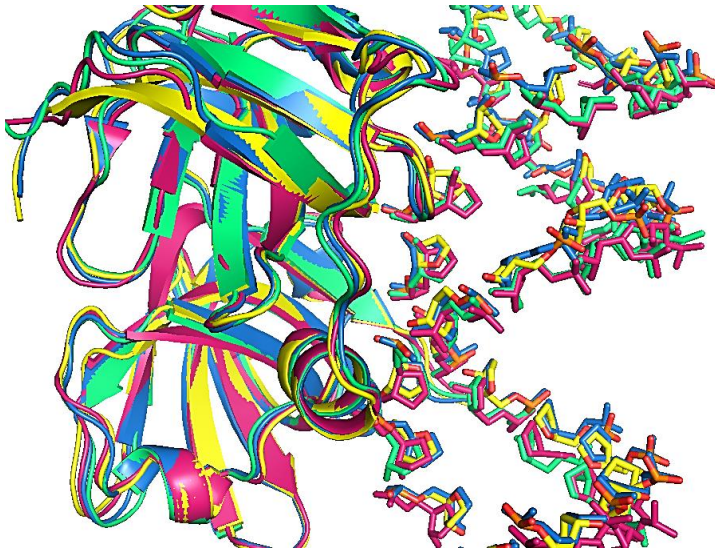

**Supplementary Figure 5 - Superimposition of the 4 HIN domains of AIM2 with dsDNA.** Related to Figure 4. Phosphate and ribose backbone of dsDNA from the crystal structure bound to each HIN domain showing binding of phosphates in discrete regions, blue: (HIN-a), green (HIN-b), yellow (HIN-c), red (HIN-d) (PDB: 3RN5). Image created using Pymol.

Supplementary figure 6

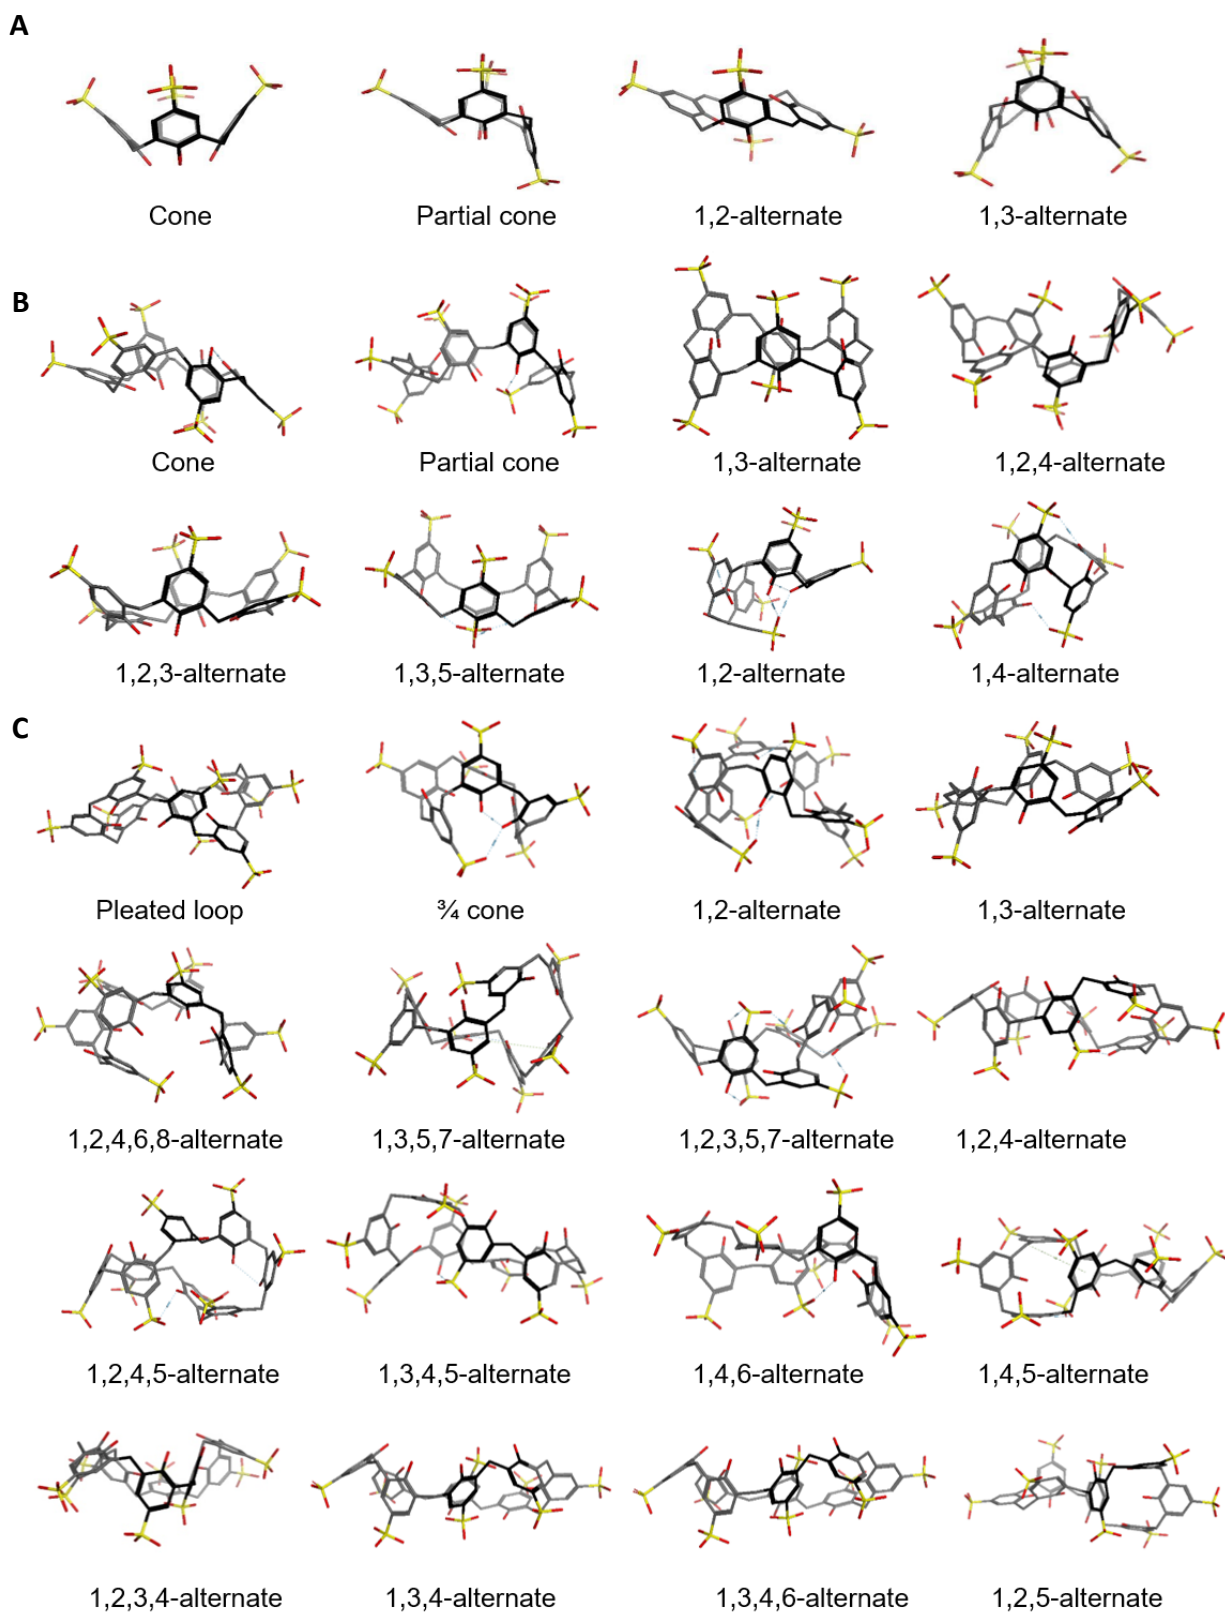

**Supplementary Figure 6 - Conformers of 4-sulfonic calixarenes.** Related to Figure 4. Stick diagrams for the different conformers of **(A)** 4-sulfonic calix[4]arene, **(B)** 4-sulfonic calix[6]arene and **(C)** 4-sulfonic calix[8]arene using MOE.



**Supplementary Table 1 - Top ranked 4-sulfonic calixarene conformers and their energies obtained from a stochastic search in MOE. Related to Figure 4.**

| #  | 4-Sulfonic calix[4]arene |              |                       | 4-Sulfonic calix[6]arene |              |                       | 4-Sulfonic calix[8]arene   |              |                       |
|----|--------------------------|--------------|-----------------------|--------------------------|--------------|-----------------------|----------------------------|--------------|-----------------------|
|    | Conformation             | E (Kcal/mol) | $\Delta E$ (Kcal/mol) | Conformation             | E (Kcal/mol) | $\Delta E$ (Kcal/mol) | Conformation               | E (Kcal/mol) | $\Delta E$ (Kcal/mol) |
| 1  | partial cone             | 238.50       | 0.00                  | 1,2,4-alternate          | 335.28       | 0.00                  | <b>1,2,4,6,8-alternate</b> | 431.59       | 0.00                  |
| 2  | cone                     | 239.62       | +1.12                 | 1,3,5-alternate          | 335.30       | +0.02                 | 1,2,4,6,8-alternate        | 433.82       | +2.23                 |
| 3  | 1,3-alternate            | 241.41       | +2.91                 | 1,4-alternate            | 335.33       | +0.05                 | 1,2-alternate              | 436.07       | +4.48                 |
| 4  | <b>1,2-alternate</b>     | 241.97       | +3.47                 | 1,3,5-alternate          | 335.36       | +0.08                 | 1,2,4,6,8- alternate       | 437.01       | +5.42                 |
| 5  | 1,2-alternate            | 241.97       | +3.47                 | 1,3,5-alternate          | 335.39       | +0.11                 | 1,2,4,6,8- alternate       | 437.49       | +5.90                 |
| 6  | 1,2-alternate            | 241.98       | +3.48                 | 1,3,5-alternate          | 335.44       | +0.16                 | ¼ cone                     | 437.58       | +5.99                 |
| 7  | 1,2-alternate            | 241.99       | +3.49                 | 1,3,5-alternate          | 338.73       | +3.45                 | 1,3,5,7-alternate          | 438.14       | +6.55                 |
| 8  | 1,3-alternate            | 242.28       | +3.78                 | 1,3,5-alternate          | 338.77       | +3.49                 | ¼ cone                     | 438.17       | +6.58                 |
| 9  | 1,3-alternate            | 242.28       | +3.78                 | 1,3,5-alternate          | 338.86       | +3.58                 | ¼ cone                     | 438.37       | +6.78                 |
| 10 | 1,2-alternate            | 242.32       | +3.82                 | 1,2,4-alternate          | 338.86       | +3.58                 | 1,2,4,6,8- alternate       | 438.66       | +7.07                 |
| 11 | 1,3-alternate            | 242.35       | +3.85                 | 1,2,4-alternate          | 338.87       | +3.59                 | 1,3,5,7-alternate          | 439.17       | +7.58                 |
| 12 | 1,3-alternate            | 242.36       | +3.86                 | 1,2,4-alternate          | 338.90       | +3.62                 | 1,2,4,6,8- alternate       | 440.26       | +8.67                 |
| 13 | 1,3-alternate            | 242.37       | +3.87                 | 1,4-alternate            | 338.92       | +3.64                 | 1,3,5,7-alternate          | 440.44       | +8.85                 |
| 14 | 1,3-alternate            | 242.73       | +4.23                 | 1,3,5-alternate          | 338.93       | +3.65                 | 1,2,4,6,8- alternate       | 440.77       | +9.18                 |
| 15 | partial cone             | 242.78       | +4.28                 | 1,3,5-alternate          | 338.94       | +3.66                 | 1,2,4,6,8- alternate       | 440.80       | +9.21                 |
| 16 | partial cone             | 242.78       | +4.28                 | 1,3,5-alternate          | 338.94       | +3.66                 | 1,3,5,7-alternate          | 440.81       | +9.22                 |
| 17 | 1,3-alternate            | 242.78       | +4.28                 | 1,3,5-alternate          | 339.00       | +3.72                 | 1,3,5,7-alternate          | 440.82       | +9.23                 |
| 18 | 1,3-alternate            | 242.80       | +4.3                  | 1,3,5-alternate          | 339.00       | +3.72                 | 1,2,3,4-alternate          | 440.88       | +9.29                 |
| 19 | 1,3-alternate            | 242.81       | +4.31                 | 1,3,5-alternate          | 339.00       | +3.72                 | 1,2,4,6,8- alternate       | 440.89       | +9.30                 |
| 20 | 1,3-alternate            | 242.86       | +4.36                 | 1,3,5-alternate          | 339.01       | +3.73                 | 1,3,5,7-alternate          | 440.89       | +9.30                 |
| 21 | 1,2-alternate            | 242.88       | +4.38                 | 1,3,5-alternate          | 339.06       | +3.78                 | 1,3,5,7-alternate          | 441.11       | +9.52                 |
| 22 | 1,3-alternate            | 242.88       | +4.38                 | 1,3,5-alternate          | 339.07       | +3.79                 | 1,2,4,6,8- alternate       | 441.41       | +9.82                 |
| 23 | partial cone             | 242.89       | +4.39                 | 1,3,5-alternate          | 339.09       | +3.81                 | 1,3,5,7-alternate          | 441.422      | +9.832                |
| 24 | partial cone             | 242.90       | +4.40                 | 1,3,5-alternate          | 339.12       | +3.84                 | 1,3,5,7-alternate          | 442.09       | +10.50                |
| 25 | partial cone             | 242.90       | +4.40                 | 1,2,4-alternate          | 339.15       | +3.87                 | 1,2,4,5-alternate          | 442.16       | +10.57                |
| 26 | partial cone             | 242.90       | +4.40                 | 1,2,4-alternate          | 339.16       | +3.88                 | 1,2,4,6,8- alternate       | 442.50       | +10.91                |
| 27 | partial cone             | 242.90       | +4.40                 | 1,2,4-alternate          | 339.16       | +3.88                 | 1,2,4,6,8- alternate       | 442.57       | +10.98                |
| 28 | 1,3-alternate            | 242.91       | +4.41                 | 1,2,4-alternate          | 339.16       | +3.88                 | 1,2,4,6,8- alternate       | 442.58       | +10.99                |
| 29 | partial cone             | 243.26       | +4.76                 | 1,2,4-alternate          | 339.18       | +3.90                 | 1,2,4,6,8- alternate       | 442.64       | +11.05                |
| 30 | 1,3-alternate            | 243.33       | +4.83                 | 1,2,4-alternate          | 339.23       | +3.95                 | 1,2,4,6,8- alternate       | 442.92       | +11.33                |
| 31 | partial cone             | 243.34       | +4.84                 | 1,3,5-alternate          | 339.33       | +4.05                 | Pleated loop               | 443.15       | +11.56                |
| 32 | 1,3-alternate            | 243.77       | +5.27                 | 1,3,5-alternate          | 339.33       | +4.05                 | 1,2,4,6,8- alternate       | 443.17       | +11.58                |
| 33 | cone                     | 243.80       | +5.30                 | 1,2,4-alternate          | 339.35       | +4.07                 | 1,2,4,6,8- alternate       | 443.20       | +11.61                |
| 34 | 1,3-alternate            | 243.80       | +5.30                 | 1,3,5-alternate          | 339.39       | +4.11                 | 1,2,3,5,7- alternate       | 443.21       | +11.62                |
| 35 | 1,3-alternate            | 243.85       | +5.35                 | 1,3,5-alternate          | 339.41       | +4.13                 | 1,2,3,5,7- alternate       | 443.21       | +11.62                |
| 36 | 1,3-alternate            | 243.96       | +5.46                 | 1,3,5-alternate          | 339.41       | +4.13                 | 1,2,3,5,7- alternate       | 443.26       | +11.67                |
| 37 | partial cone             | 243.98       | +5.48                 | 1,3,5-alternate          | 339.45       | +4.17                 | 1,2,4,6,8- alternate       | 443.33       | +11.74                |
| 38 | 1,3-alternate            | 243.98       | +5.48                 | 1,3,5-alternate          | 339.61       | +4.33                 | Pleated loop               | 443.41       | +11.82                |
| 39 | partial cone             | 244.24       | +5.74                 | 1,3,5-alternate          | 339.61       | +4.33                 | 1,3,5,7-alternate          | 443.45       | +11.86                |
| 40 | 1,3-alternate            | 244.26       | +5.76                 | 1,3,5-alternate          | 339.76       | +4.48                 | 1,2,4,6,8- alternate       | 433.58       | +1.99                 |
| 41 | partial cone             | 244.30       | +5.80                 | 1,2,4-alternate          | 339.96       | +4.68                 | 1,2,4,6,8- alternate       | 443.61       | +2.02                 |
| 42 | partial cone             | 244.30       | +5.80                 | 1,2,4-alternate          | 339.97       | +4.69                 | 1,3,5,7-alternate          | 443.67       | +12.08                |
| 43 | 1,3-alternate            | 244.31       | +5.81                 | 1,2,4-alternate          | 339.97       | +4.69                 | ¼ cone                     | 443.69       | +12.10                |
| 44 | partial cone             | 244.31       | +5.81                 | 1,3,5-alternate          | 339.99       | +4.71                 | 1,2,4,6,8- alternate       | 443.86       | +12.27                |
| 45 | 1,3-alternate            | 244.32       | +5.82                 | 1,2,4-alternate          | 340.02       | +4.74                 | 1,2,4,6,8- alternate       | 443.87       | +12.28                |
| 46 | partial cone             | 244.35       | +5.85                 | 1,3,5-alternate          | 340.03       | +4.75                 | 1,2,4,6,8- alternate       | 443.91       | +12.32                |
| 47 | 1,3-alternate            | 244.40       | +5.90                 | 1,3,5-alternate          | 340.05       | +4.77                 | 1,2,4,6,8- alternate       | 443.96       | +12.37                |
| 48 | partial cone             | 244.42       | +5.92                 | 1,2,4-alternate          | 340.06       | +4.78                 | 1,2,4,6,8- alternate       | 443.98       | +12.39                |
| 49 | partial cone             | 244.43       | +5.93                 | 1,2,4-alternate          | 340.08       | +4.80                 | 1,2,4,6,8- alternate       | 444.00       | +12.41                |

**Supplementary Table 2 - Docking scores of the top 10 docked conformers for 4-sulfonic calix[4]arene, 4-sulfonic calix[6]arene and 4-sulfonic calix[8]arene in AIM2 HIN domain (PDB: 3RN5) using MOE. Related to Figure 4.**

| MOE                      |                          |                          |                          |                             |                          |
|--------------------------|--------------------------|--------------------------|--------------------------|-----------------------------|--------------------------|
| 4-Sulfonic calix[4]arene |                          | 4-Sulfonic calix[6]arene |                          | 4-Sulfonic calix[8]arene    |                          |
| Docking conformation     | Docking score (Kcal/mol) | Docking conformation     | Docking score (Kcal/mol) | Docking conformation        | Docking score (Kcal/mol) |
| 1,2-alternate            | -6.7                     | <b>1,3-alternate</b>     | -8.4                     | 1,2,4,6,8- alternate        | -10.2                    |
| Cone                     | -5.8                     | 1,3- alternate           | -8.4                     | <b>1,2,4,6,8- alternate</b> | -9.9                     |
| 1,2-alternate            | -5.5                     | 1,3- alternate           | -8.3                     | ¾ cone                      | -9.9                     |
| 1,2-alternate            | -5.5                     | partial cone             | -8.3                     | 1,2,4,6,8- alternate        | -9.8                     |
| 1,2-alternate            | -5.5                     | partial cone             | -8.1                     | 1,2,4,6,8- alternate        | -9.6                     |
| 1,2-alternate            | -5.5                     | partial cone             | -8.1                     | ¾ cone                      | -9.5                     |
| 1,2-alternate            | -5.5                     | 1,3,5- alternate         | -8.1                     | 1,2-alternate               | -9.4                     |
| <b>1,2-alternate</b>     | -5.0                     | 1,2,4- alternate         | -8.1                     | 1,2,4,6,8- alternate        | -9.4                     |
| 1,2-alternate            | -4.5                     | 1,4- alternate           | -7.8                     | Pleated loop                | -9.4                     |
| 1,2-alternate            | -4.4                     | 1,4- alternate           | -7.8                     | 1,3,5,7-alternate           | -9.3                     |

**Supplementary Table 3 - Docking scores of the top 20 docked conformers for 4-sulfonic calix[4]arene, 4-sulfonic calix[6]arene and 4-sulfonic calix[8]arene in AIM2 HIN domain (PDB: 3RN5) using Autodock Vina. Related to Figure 4.**

| Conformer docking pose | AutoDock Vina            |              |               |       |                          |              |               |                 |                 |               |                 |       |                          |                   |               |                 |                     |               |                 |                 |                   |                   |                   |                 |                   |                   |        |              |
|------------------------|--------------------------|--------------|---------------|-------|--------------------------|--------------|---------------|-----------------|-----------------|---------------|-----------------|-------|--------------------------|-------------------|---------------|-----------------|---------------------|---------------|-----------------|-----------------|-------------------|-------------------|-------------------|-----------------|-------------------|-------------------|--------|--------------|
|                        | 4-Sulfonic calix[4]arene |              |               |       | 4-Sulfonic calix[6]arene |              |               |                 |                 |               |                 |       | 4-Sulfonic calix[8]arene |                   |               |                 |                     |               |                 |                 |                   |                   |                   |                 |                   |                   |        |              |
|                        | Docking score (Kcal/mol) |              |               |       | Docking score (Kcal/mol) |              |               |                 |                 |               |                 |       | Docking score (Kcal/mol) |                   |               |                 |                     |               |                 |                 |                   |                   |                   |                 |                   |                   |        |              |
|                        | 1,2-alternate            | partial cone | 1,3-alternate | cone  | 1,2-alternate            | partial cone | 1,4-alternate | 1,2,4-alternate | 1,2,3-alternate | 1,3-alternate | 1,3,5-alternate | cone  | 1,2-alternate            | 1,3,5,7-alternate | 1,4-alternate | 1,2,4-alternate | 1,2,4,6,8-alternate | 1,5-alternate | 1,3,5-alternate | 1,4,5-alternate | 1,2,3,4-alternate | 1,3,4,6-alternate | 1,4,5,6-alternate | 1,2,5-alternate | 1,3,4,5-alternate | 1,2,4,5-alternate | ¾ cone | Pleated loop |
| 1                      | -16.2                    | -16.1        | -15.3         | -16.1 | -16.0                    | -16.2        | -15.2         | -16.3           | -16.1           | -15.4         | -15.3           | -13.6 | -15.9                    | -14.9             | -15.4         | -14.5           | -15.6               | -15.9         | -14.4           | -15.7           | 14.7              | -15.7             | -13.4             | -16.0           | -15.7             | -14.4             | -14.7  |              |
| 2                      | -15.2                    | -16.1        | -15.1         | -15.6 | -14.6                    | -16.2        | -14.4         | -15.2           | -15.1           | -14.6         | -14.6           | -15.8 | -13.5                    | -15.3             | -14.3         | -14.9           | -14.2               | -15.3         | -15.6           | -14.0           | -14.9             | -13.9             | -14.9             | -13.0           | -13.1             | -14.9             | -13.4  | -14.5        |
| 3                      | -15.0                    | -14.3        | -14.9         | -13.8 | -14.3                    | -16.0        | -14.3         | -14.8           | -14.4           | -13.2         | -14.4           | -15.7 | -13.2                    | -14.9             | -14.2         | -14.3           | -14.1               | -13.6         | -14.7           | -13.7           | -14.5             | -13.8             | -14.2             | -12.8           | -12.8             | -14.5             | -13.1  | -13.6        |
| 4                      | -14.9                    | -14.2        | -14.7         | -13.7 | -14.2                    | -14.6        | -14.2         | -14.8           | -14.3           | -13.1         | -13.4           | -15.2 | -13.2                    | -13.9             | -14.1         | -14.3           | -13.9               | -13.4         | -14.7           | -13.6           | -14.5             | -13.6             | -14.1             | -12.7           | -12.7             | -14.1             | -13.0  | -13.6        |
| 5                      | -14.8                    | -13.5        | -14.5         | -13.6 | -14.1                    | -14.5        | -14.1         | -14.7           | -14.3           | -12.5         | -13.3           | -15.1 | -13.2                    | -13.8             | -13.2         | -14.1           | -13.8               | -13.3         | -14.6           | -13.6           | -14.0             | -13.6             | -14.0             | -12.5           | -12.6             | -13.9             | -12.8  | -13.3        |
| 6                      | -14.6                    | -13.2        | -14.4         | -13.5 | -13.7                    | -13.0        | -13.6         | -14.2           | -14.0           | -12.4         | -13.1           | -14.7 | -13.1                    | -13.2             | -13.1         | -13.1           | -13.4               | -12.9         | -14.4           | -13.4           | -13.9             | -13.6             | -13.9             | -12.3           | -12.4             | -13.7             | -12.7  | -13.3        |
| 7                      | -14.0                    | -13.2        | -14.4         | -13.3 | -13.1                    | -13.0        | -13.5         | -14.1           | -13.9           | <b>-12.4</b>  | -13.1           | -13.7 | -12.3                    | -13.0             | -13.0         | -12.8           | <b>-13.3</b>        | -12.5         | -14.3           | -13.3           | -13.8             | -13.5             | -12.6             | -12.3           | -12.2             | -13.1             | -12.7  | -13.3        |
| 8                      | -13.3                    | -13.2        | -14.4         | -13.1 | -12.8                    | -12.9        | -13.3         | -13.8           | -13.9           | -12.1         | -13.0           | -13.3 | -12.2                    | -13.0             | -12.9         | -12.5           | -13.0               | -12.5         | -13.9           | -13.2           | -13.5             | -13.4             | -12.3             | -11.7           | -11.7             | -12.8             | -12.6  | -13.1        |
| 9                      | -13.1                    | -13.2        | -14.0         | -12.7 | -12.5                    | -12.6        | -13.0         | -13.4           | -13.9           | -12.1         | -12.8           | -13.3 | -12.1                    | -12.8             | -12.9         | -12.2           | -11.9               | -12.2         | -13.7           | -13.0           | -13.3             | -13.4             | -12.2             | -11.7           | -11.5             | -12.8             | -12.5  | -12.9        |
| 10                     | -13.0                    | -13.1        | -13.9         | -12.7 | -12.4                    | -12.5        | -12.8         | -13.1           | -13.6           | -12.1         | -12.8           | -13.2 | -11.9                    | -12.8             | -12.6         | -12.1           | -11.6               | -12.2         | -13.7           | -13.0           | -13.3             | -13.3             | -12.1             | -11.6           | -11.5             | -12.8             | -12.4  | -12.6        |
| 11                     | -12.9                    | -12.8        | -13.7         | -12.5 | -12.3                    | -12.4        | -12.5         | -12.9           | -13.5           | -12.0         | -12.7           | -13.1 | -11.7                    | -12.8             | -12.5         | -12.0           | -11.5               | -12.2         | -12.6           | -12.8           | -13.0             | -13.1             | -11.9             | -11.6           | -11.4             | -12.6             | -11.9  | -12.3        |
| 12                     | -12.9                    | -12.7        | -13.3         | -12.5 | -12.0                    | -12.2        | -12.5         | -12.5           | -13.3           | -11.8         | -12.6           | -12.5 | -11.7                    | -12.5             | -12.5         | -11.9           | -11.2               | -12.2         | -12.5           | -12.8           | -12.6             | -13.0             | -11.8             | -11.1           | -11.3             | -12.6             | -11.6  | -11.9        |
| 13                     | -12.6                    | -12.3        | -13.2         | -12.3 | -11.9                    | -12.0        | -12.5         | -12.2           | -13.3           | -11.7         | -12.6           | -12.4 | -11.3                    | -12.5             | -12.5         | -11.8           | -11.2               | -12.1         | -12.3           | -12.8           | -12.3             | -12.9             | -11.8             | -11.1           | -11.0             | -12.2             | -11.5  | -11.9        |
| 14                     | -12.5                    | -12.1        | -12.5         | -12.0 | -11.9                    | -11.9        | -12.1         | -12.0           | -13.2           | -11.6         | -12.5           | -12.0 | -11.3                    | -12.4             | -12.2         | -11.4           | -10.8               | -12.0         | -12.0           | -12.5           | -12.1             | -12.7             | -11.5             | -10.9           | -10.7             | -12.2             | -11.4  | -11.6        |
| 15                     | -12.4                    | -12.0        | -12.2         | -11.5 | -11.9                    | -11.8        | -12.1         | -11.5           | -13.2           | -11.6         | -12.5           | -11.9 | -11.1                    | -12.3             | -12.0         | -11.3           | -10.7               | -12.0         | -11.8           | -12.5           | -11.8             | -12.6             | -11.5             | -10.9           | -10.5             | -11.9             | -11.3  | -11.0        |
| 16                     | -12.4                    | -12.0        | -12.1         | -11.5 | -11.9                    | -11.7        | -12.0         | -11.4           | -13.2           | -11.3         | -12.1           | -11.8 | -11.1                    | -12.3             | -12.0         | -11.3           | -10.5               | -11.9         | -11.7           | -12.5           | -11.6             | -12.5             | -11.4             | -10.8           | -10.4             | -11.7             | -10.9  | -10.9        |
| 17                     | -12.2                    | -11.9        | -12.0         | -11.2 | -11.8                    | -11.7        | -11.9         | -11.2           | -13.0           | -11.2         | -12.0           | -11.7 | -10.8                    | -12.1             | -12.0         | -11.3           | -10.5               | -11.8         | -11.7           | -12.4           | -11.3             | -12.3             | -11.4             | -10.7           | -10.3             | -11.7             | -10.9  | -10.6        |
| 18                     | -12.1                    | -11.7        | -12.0         | -11.1 | -11.8                    | -11.3        | -11.9         | -11.2           | -12.8           | -11.0         | -11.7           | -11.7 | -10.7                    | -12.1             | -11.8         | -11.3           | -10.4               | -11.4         | -11.5           | -12.2           | -11.2             | -12.2             | -11.1             | -10.7           | -10.3             | -11.5             | -10.9  | -10.4        |
| 19                     | -11.9                    | -11.5        | -12.0         | -11.1 | -11.6                    | -11.3        | -11.7         | -11.1           | -12.4           | -11.0         | -11.7           | -11.4 | -10.6                    | -11.9             | -11.7         | -11.3           | -10.3               | -11.3         | -11.2           | -12.1           | -10.7             | -12.0             | -11.0             | -10.7           | -10.3             | -11.3             | -10.8  | -10.4        |
| 20                     | <b>-11.7</b>             | -11.4        | -11.9         | -10.7 | -11.5                    | -11.2        | -11.3         | -10.9           | -12.2           | -10.8         | -11.6           | -11.3 | -10.2                    | -11.8             | -11.7         | -11.1           | -10.3               | -11.2         | -11.1           | -12.1           | -10.6             | -11.9             | -11.0             | -10.5           | -10.1             | -11.2             | -10.7  | -10.4        |

Supplementary Figure 7

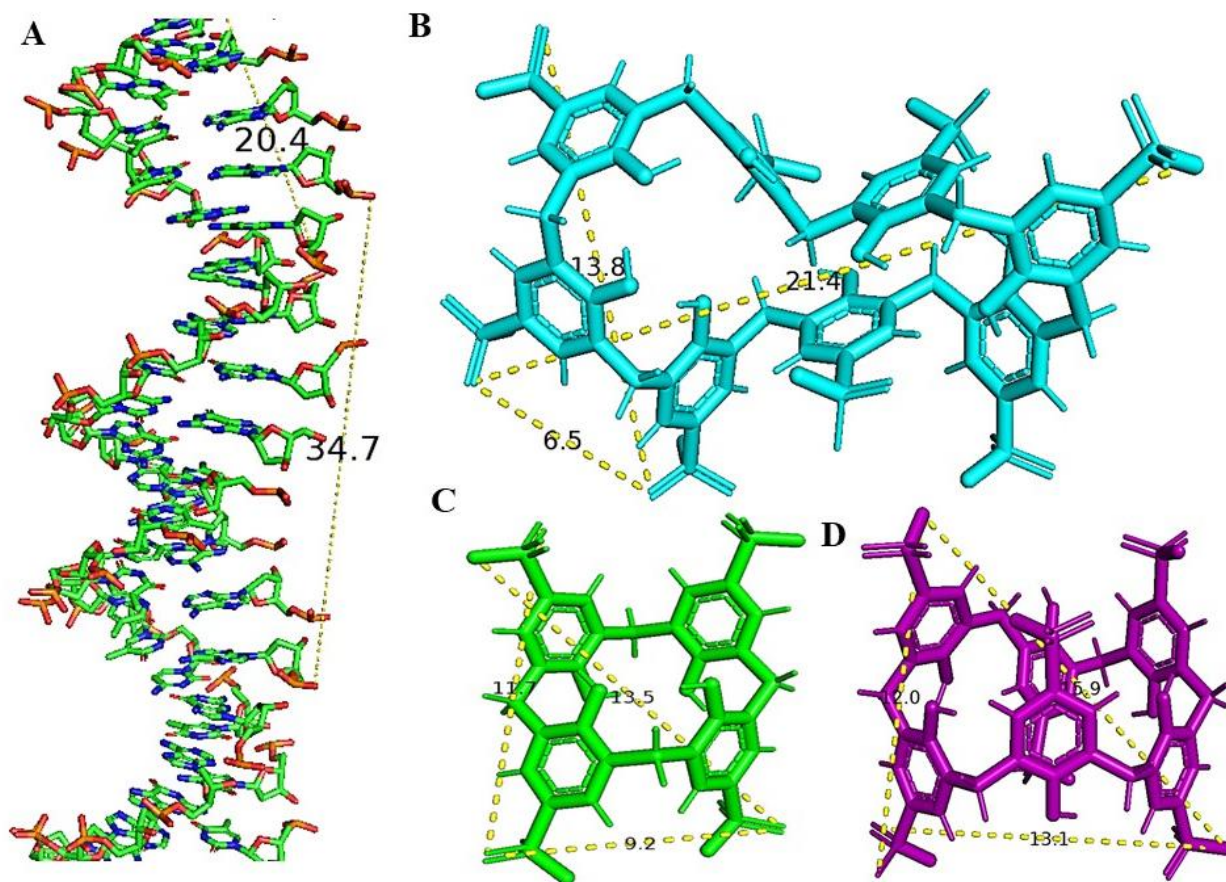

**Supplementary Figure 7 - Largest measured O-O distances of dsDNA and 4-sulfonic calixarenes.** Related to Figure 4. Yellow dashed lines show largest O-O distances in (A) co-crystallized dsDNA in AIM2 for minor groove and major groove regions (PDB: 3RN5), (B) 4-sulfonic calix[8]arene, (C) 4-sulfonic calix[4]arene, (D) 4-sulfonic calix[6]arene. Image created using Pymol.

Supplementary Figure 8

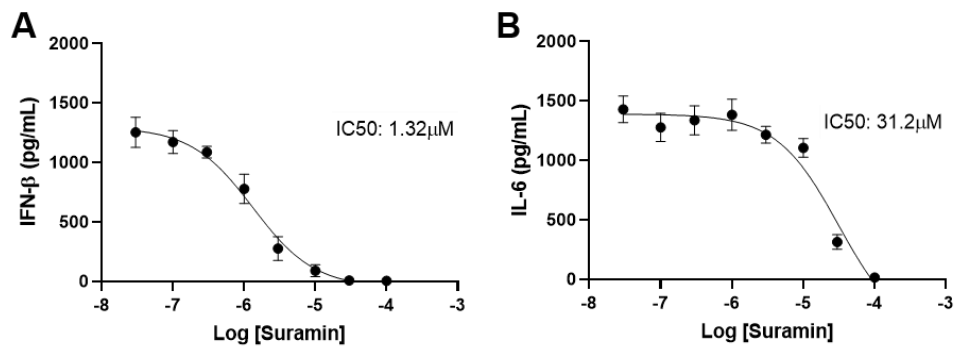

**Supplementary Figure 8 – Suramin is an inhibitor of dsDNA-induced IFN- $\beta$  release and CpG-induced IL-6 release.** Related to Figure 6. **(A)** IFN- $\beta$  release into the supernatants of bone marrow derived macrophages (BMDMs). BMDMs were treated with the indicated concentration of suramin (0.03 – 100  $\mu$ M) before transfection with poly dA:dT (1  $\mu$ g mL<sup>-1</sup>, 6 h) (n=4). **(B)** IL-6 release in the supernatants of BMDMs pre-treated with the indicated concentration of suramin (0.03 – 100  $\mu$ M) and stimulated with CpG DNA (1  $\mu$ M, 6 h) (n=4). Concentration-response curves were fitted using a four parameter logistical (4PL) model. Values shown are mean  $\pm$  the SEM.

Supplementary Figure 9

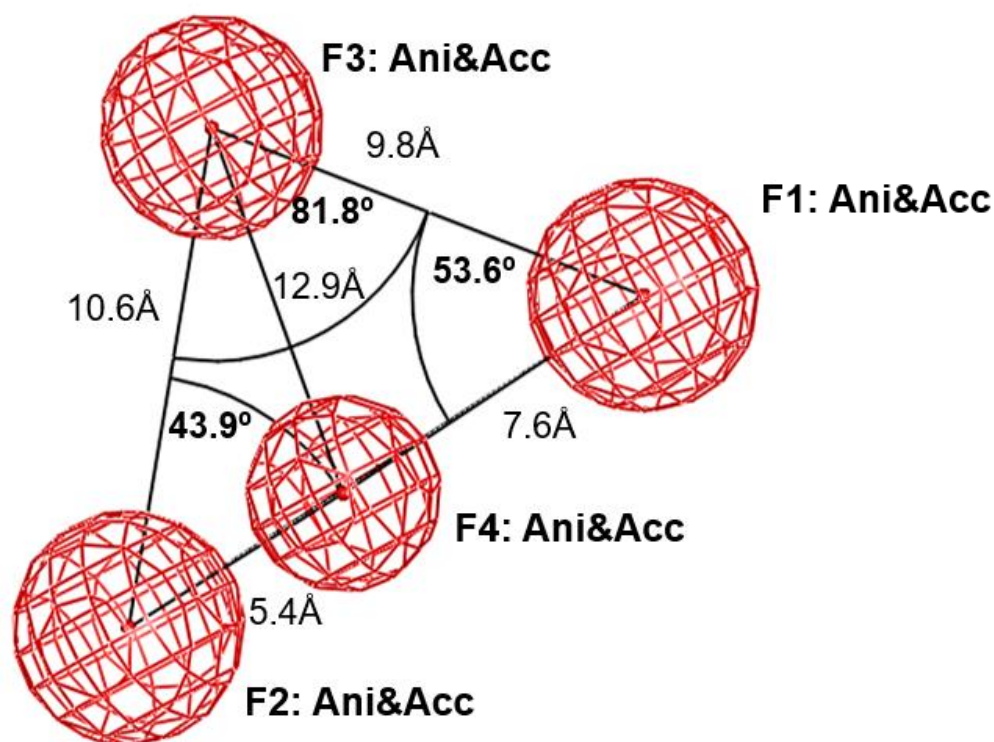

**Supplementary Figure 9 - Pharmacophore model of the dsDNA binding site of the HIN domain of AIM2.** Related to Figure 6. A pharmacophore model derived from the best binding modes from the docking of 4-sulfonic calixarenes in the AIM2 HIN domain (PDB:3RN5) using Autodock Vina and MOE after overlay of the docked poses. The pharmacophore consists of four ionic interaction sites with radii of 2.1 Å, 2.4 Å, 2.5 Å and 2.5 Å (red spheres). Distances and dihedral angles are shown.

**Supplementary Table 4 - Ionic interactions and docking scores of the conformers (conf1 & conf2) for suramin in AIM2 (PDB: 3RN5) using MOE and AutoDock Vina.** Related to Figure 6. Distances from the sulfonate oxygens of suramin to the positively charged amino acid side chains in the HIN domain binding pocket.

| Interacting residue      | MOE (Å)         | AutoDock Vina (Å) |                 |
|--------------------------|-----------------|-------------------|-----------------|
|                          | Suramin (conf1) | Suramin (conf1)   | Suramin (conf2) |
| Docking score (Kcal/mol) | -12.2           | -18.9             | -22.0           |
| Lys160                   | 2.7             | 2.9               | -               |
| Lys162                   | 2.9             | 3.1               | -               |
| Lys163                   | 2.1             | 2.9               | 2.6             |
| Lys198                   | 3.2             | 3.5               | 3.4             |
| Lys204                   | 2.8             | 2.1               | -               |
| Lys251                   | -               | -                 | 3.2             |
| Arg311                   | 1.7*            | 2.3*              | -               |
| Lys335                   | -               | -                 | -               |

Supplementary Figure 10

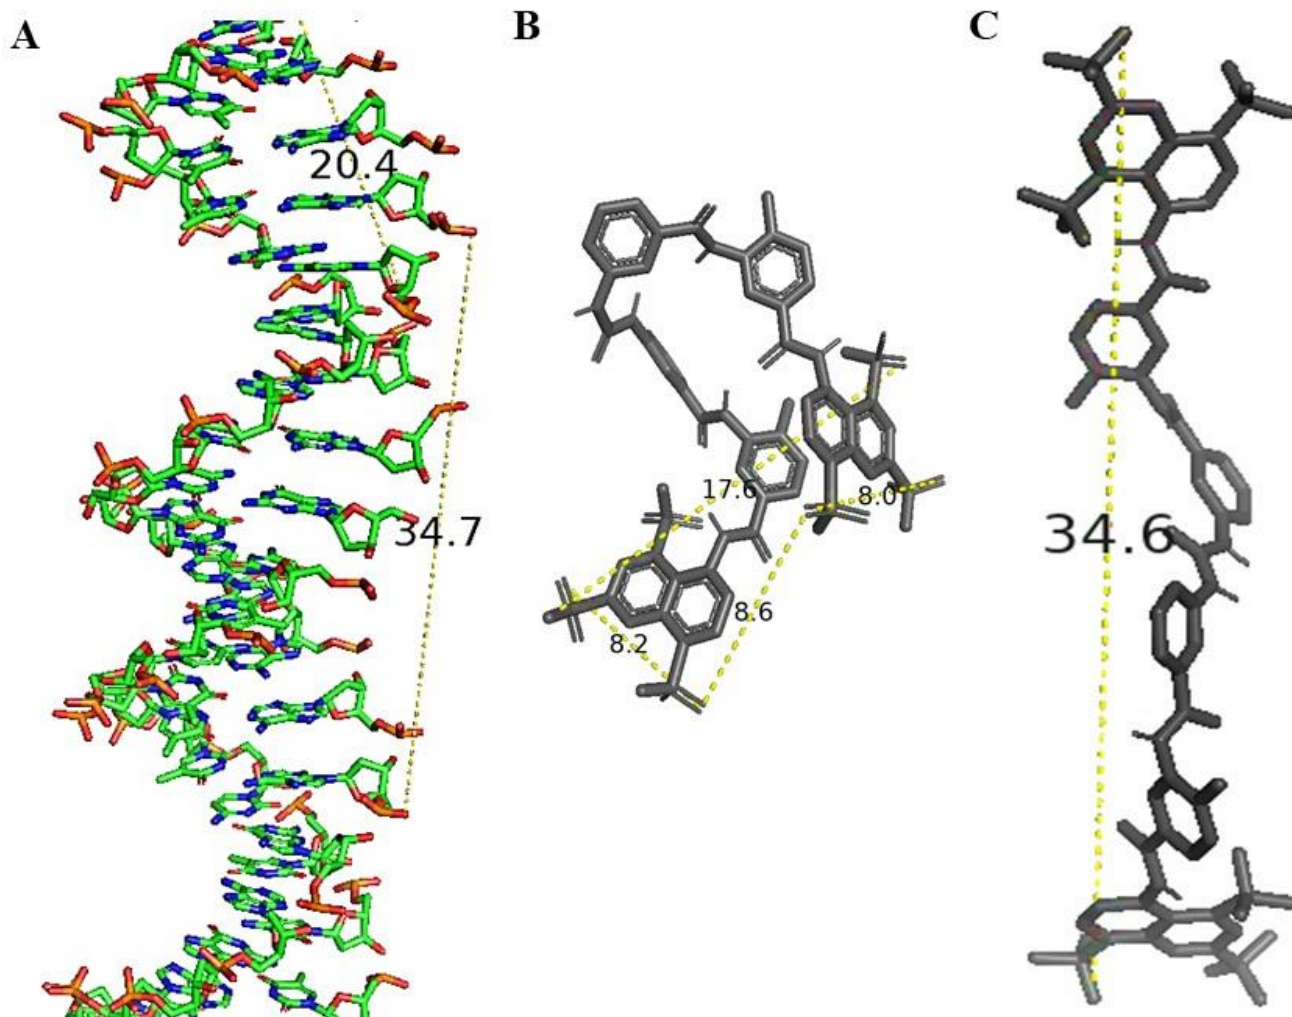

**Supplementary Figure 10 - Largest measured O-O distances of dsDNA and suramin.** Related to Figure 6. Yellow dashed lines show largest O-O distances in **(A)** co-crystallized dsDNA in AIM2 for minor groove and major groove regions (PDB: 3RN5), **(B)** preferred docked pose of suramin in the HIN domain (PDB:3RN5), **(C)** extended conformer of suramin for the preferred pose between the 2 HIN domains of AIM2. Image created using Pymol.
